# Supplementary material for: Creating a universal SNP and small indel variant caller with deep neural networks
Source: bioRxiv or medRxiv preprint supplement (doi:10.1101/092890), 2018-03-20
Supplement: Supplementary file [file 092890-1.pdf]

# Supplementary materials for "Creating a universal SNP and small indel variant caller with deep neural networks"

## **Table of contents**

[Haplotype-aware realignment of reads](#)

[Finding candidate variants](#)

[Creating images around candidate variants](#)

[Deep learning](#)

[DeepVariant inference client and allele merging](#)

[Genome in a Bottle human reference datasets](#)

[Evaluating variant calls](#)

[GATK pipeline](#)

[Versions](#)

[BWA](#)

[Mark Duplicates](#)

[Indel realignment](#)

[Base recalibration](#)

[HaplotypeCaller](#)

[VQSR](#)

[DeepVariant and GATK on Platinum Genomes NA12878](#)

[DeepVariant vs. GATK on NA12878 replicates](#)

[Training and generalization of DeepVariant models across genome builds](#)

[Training and generalization of DeepVariant models across species](#)

[DeepVariant training on multiple sequencing technologies](#)

[Comparison of DeepVariant exome calls with technology-specific variant calls submitted to Genome in a Bottle](#)

[References](#)

## Haplotype-aware realignment of reads

Mapped reads are preprocessed using an error-tolerant, local De-Bruijn-graph-based read assembly procedure which realigns them according to their most likely derived haplotype. Candidate windows across the genome are selected for reassembly by looking for any evidence of possible genetic variation such as mismatching or soft clipped bases. The selection criteria

for a candidate window are very permissive so that true variation is unlikely to be missed. All candidate windows across the genome are considered independently. De-Bruijn graphs are constructed using multiple fixed k-mer sizes (from 20 to 75, inclusive, with increments of 5) out of the reference genome bases for the candidate window as well as all overlapping reads. Edges are given a weight determined by how many times they are observed in the reads. We trim any edges with weight less than three, except edges found in the reference are never trimmed. Candidate haplotypes are generated by traversing the assembly graphs and the top two most likely haplotypes are selected which best explain the read evidence. The likelihood function used to score haplotypes is a traditional pair HMM with fixed parameters that do not depend on base quality scores. This likelihood function assumes that each read is independent. Finally, each read is then realigned to its most likely haplotype using a Smith-Waterman-like algorithm with an additional affine gap penalty score for homopolymer indels. This procedure updates both the position and the CIGAR string for each read.

## Finding candidate variants

Candidate variants for evaluation with the deep learning model are identified with the following algorithm. We consider each position in the reference genome independently. For each site in the genome we collect all the reads that overlap that site. The CIGAR string of each read is decoded and the corresponding allele aligned to that site is determined, which are classified into either a reference-matching base, a reference-mismatching base, an insertion with a specific sequence, or a deletion with a specific length. We count the number of occurrences of each distinct allele across all reads. An allele is considered a candidate if it satisfies:

```
def is_candidate(counts, allele):
    allele_count = counts[allele]
    total_counts = sum(counts.values())
    return not is_reference_base(allele)
           and allele_count >= min_count
           and allele_count / total_count >= min_fraction
```

If any candidates pass our calling thresholds at a site in the genome, we emit a VCF-like record with chromosome, start, reference bases and alternate bases, where reference bases and alternate bases are the VCF-compatible representation of all of the passing alleles.

We filter away any unusable reads (see `is_usable_read()` below) if it is marked as a duplicate, as failing vendor quality checks, isn't aligned or if this isn't the primary alignment, mapping quality is less than 10, or the read is paired and not marked as properly placed. We further only include read bases as potential alleles if all of the bases in the alleles have a base quality  $\geq 10$ . We only emit variant calls at standard (ACGT) bases in the reference genome. It is possible to force candidate variants to be emitted (randomly with probability of  $p$ ) at sites with no alternate alleles, which are used homozygous reference training sites. There's no constraint on the size of indels emitted, so long as the exact position and bases are present in the cigar string and they are consistent across multiple reads.

## Creating images around candidate variants

The second phase of DeepVariant encodes the reference and read support for each candidate variant into an RGB image. The pseudo-code for this component is shown below; it contains all of the key operations to build the image, leaving out for clarity error handling, code to deal with edge cases like when variants occur close to the start or end of the chromosome, and the implementation of non-essential and/or obvious functions.

```
WIDTH = 221
HEIGHT = 100;

def create_pileup_images(candidate_variants):
    for candidate in candidate_variants:
        for biallelic_variant in split_into_biallelics(candidate):
            start = biallelic_variant.start - (WIDTH-1) / 2
            end = WIDTH - span_start
            ref_bases = reference.get_bases(start, end)
            image = Image(WIDTH, HEIGHT)
            row_i = fill_reference_pixels(ref, image)
            for read in reads.get_overlapping(start, end):
                if row_i < HEIGHT and is_usable_read(read):
                    add_read(image, read, row_i)
                    row_i += 1
            yield image

def fill_reference_pixels(ref, image):
    for row in range(5):
        for col in range(WIDTH):
            alpha = 0.4
            ref_base = ref[col]
            red = get_base_color(ref_base)
            green = get_quality_color(60) # The reference is high quality
            blue = get_strand_color(True) # The reference is on the positive strand
            image[row, col] = make_pixel(red, green, blue, alpha)
    return 5

def add_read(image, read, row_i):
    # Don't incorporate reads with a low quality base at the call position. This
    # function still returns true because the image isn't yet full.
    # base_quality_at_call_position() returns the quality of the base aligned to
    # our call.start, or 255 if no bases are aligned there.
    if base_quality_at_call_position(read) < MINIMUM_BASE_QUALITY:
        return

    for ref_pos, read_pos, cigar_elt in per_base_alignment(ref, read):
        read_base = None
        if cigar_elt in {'D', 'I'}:
            col = ref_pos - 1
            read_base = INDEL_ANCHORING_BASE
        elif cigar_elt == 'M':
            col = ref_pos
```

```
read_base = read.bases[read_pos]

if read_base:
    quality = min(read.quals[read_pos], read.mapping_quality)
    alpha = get_base_alpha(read_base, ref[col], read, call)
    red = get_base_color(read_base)
    green = get_quality_color(quality)
    blue = get_strand_color(read.is_on_positive_strand)
    image[row_i, col] = make_pixel(red, green, blue, alpha)

def make_pixel(red, green, blue, alpha):
    return RGB(int(alpha * red), int(alpha * green), int(alpha * blue))

def get_base_alpha(read_base, ref_base, read, call):
    # read_supports_alt_allele() returns True if the read supports the alt_allele.
    # This is implemented by associating each alternative allele in our candidate
    # variants with a list of the names of the reads that contained that allele.
    alpha1 = 1.0 if read_supports_alt_allele(read, call.alt_allele) else 0.6
    alpha2 = 0.2 if read_base == ref_base else 1.0
    return alpha1 * alpha2

def get_base_color(base):
    base_to_color = {'A': 250, 'G': 180, 'T': 100, 'C': 30}
    return base_to_color.get(base, 0)

def get_quality_color(quality):
    return int(254.0 * (min(40, quality) / 40.0))

def get_strand_color(on_positive_strand):
    return 70 if on_positive_strand else 240

def is_usable_read(read):
    return (read.has_alignment and
            not (read.is_duplicate or read.failed_vendor_quality_checks or
                read.is_secondary or read.is_supplementary) and
            (not read.is_paired or read.is_properly_placed) and
            read.mapping_quality >= 10)
```

The actual implementation of this code uses a reservoir sampler to randomly remove reads at locations where there's excessive coverage. This downsampling occurs conceptually within the `reads.get_overlapping()` function but occurs in our implementation anywhere where there's more than 10,000 reads in a tiling of 300 bp intervals on the chromosome.

## Deep learning

DistBelief<sup>1</sup> was used to represent models, train models on labeled images, export trained models, and evaluate trained models on unlabeled images. We adapted the inception v2 architecture to our input images and our three-state (hom-ref, het, hom-alt) genotype classification problem. Specifically, we created an input image layer that rescales our input images to 299 x 299 pixels without shifting or scaling of our pixel values. This input layer is

attached to the ConvNetJuly2015v2<sup>2</sup> CNN with 9 partitions and weight decay of 0.00004. The final output layer of the CNN is a three-class Softmax layer with fully-connected inputs to the preceding layer initialized with Gaussian random weights and stddev of 0.001 and a weight decay of 0.00004.

The CNN was trained using stochastic gradient descent in batches of 32 images with 8 replicated models and RMS decay of 0.9. For the the Platinum Genomes, Precision FDA, NA12878 replicates, mouse and genome build experiments multiple models were trained (using the product of learning rates of [0.00095, 0.001, 0.0015] and momenta [0.8, 0.85, 0.9]) for 80 hrs or until training accuracy converged, and the model with the highest accuracy on the training set selected as the final model. For the multiple sequencing technologies experiment, a single model was trained with learning rate 0.0015 and momentum 0.8 for 250,000 update steps. In all experiments unless otherwise noted the CNN was initialized with weights from the imagenet model ConvNetJuly2015v2<sup>2</sup>.

## DeepVariant inference client and allele merging

At inference time each biallelic candidate variant site represented as a pileup image is presented as input to the trained CNN. After a forward pass through the network a three-state probability distribution is returned. These probabilities correspond to the biallelic genotype likelihood states of {P(homozygous reference), P(heterozygous), P(homozygous variant)} and are encoded directly in the output VCF record as the phred scaled GL field. Variant calls are emitted for all sites where the most likely genotype is either het or hom-alt with at least a Q4 genotype confidence. Finally all biallelic records at the same starting position are merged into multiallelic records to facilitate comparisons with other datasets.

## Genome in a Bottle human reference datasets

We used version 3.2.1 of the Genome in a Bottle reference data<sup>3</sup>. We downloaded calls in VCF format and confident called intervals in BED format from:

- NA12878:  
[https://ftp-trace.ncbi.nlm.nih.gov/giab/ftp/release/NA12878\\_HG001/NISTv3.2.1/](https://ftp-trace.ncbi.nlm.nih.gov/giab/ftp/release/NA12878_HG001/NISTv3.2.1/)
- NA24385:

[https://ftp-trace.ncbi.nlm.nih.gov/giab/ftp/release/AshkenazimTrio/HG002\\_NA24385\\_son/NISTv3.2.1/](https://ftp-trace.ncbi.nlm.nih.gov/giab/ftp/release/AshkenazimTrio/HG002_NA24385_son/NISTv3.2.1/)

The VCF files were converted to Global Alliance for Global Health (GA4GH) protocol buffer format but otherwise were used without further modification.

## Evaluating variant calls

Truth variants and confident reference intervals were parsed from the Genome in a Bottle or other ground standard datasets from the VCF and BED files for their respective samples. Truth

variants outside the confident intervals were removed. The evaluation variants were loaded and variants marked as filtered or assigned homozygous reference genotypes were removed. Metrics such as the number of SNPs, number of Indels, insertion / deletion ratio, heterozygous / homozygous non-reference ratio, and transition / transversion ratio (Ti/Tv) were calculated from all remaining evaluation variants.

Evaluation variants were matched to truth variants if they start at the same position on the same chromosome. To compute genotype concordance, we added to the list of matched pairs of evaluation / truth variants all of the unmatched evaluation variants that overlap the confidence intervals with a "virtual" homozygous reference genotype sample. The number of matching genotype is defined as the number of pairs where the genotype alleles of the evaluation variant and truth variant are equal, independent of order. From this we compute the genotyping concordance as:

Genotype concordance = # matching genotypes / # of paired evaluation and truth variants

The number of matched pairs is counted as the number of truth positives. Any truth variants without a matched evaluation variant are counted as false negatives. Any unmatched evaluation variants that occur within the confident intervals are counted as false positives. From the number of true positives (TP), false negatives (FN), and false positives (FP) we compute the sensitivity, PPV, and F1 as:

$$\begin{aligned}\text{Sensitivity} &= \text{TP} / (\text{TP} + \text{FN}) \\ \text{PPV} &= \text{TP} / (\text{TP} + \text{FP}) \\ \text{F1} &= 2 \text{TP} / (2\text{TP} + \text{FN} + \text{FP})\end{aligned}$$

Our evaluation metrics fall between the tolerant hapdip metric<sup>4</sup> and the strict vcfeval<sup>5</sup> metrics. In particular, our sensitivity and PPV metrics emphasize discriminating between variant and reference sites, allowing errors in the determination of the exact variant alleles and genotypes. These errors are tallied separately as an allelic error rate and a genotyping error rate. Though we believe this separation is informative and valuable for understanding the types of errors that occur in a variant callset, we appreciate the approaches pursued by other evaluation methods.

## GATK pipeline

For all GATK<sup>6</sup> analyses (except the Platinum Genomes analysis, see below) we used the Verily production GATK pipeline:

### Versions

Reference: hg38.genome.fa  
dbSNP: v146 on b38 downloaded from NCBI  
1000 Genomes Phase 3 callset:  
1000G\_ALL.wgs.phase3\_shapeit2\_mvncall\_integrated\_v5b.20130502.sites.hg38.vcf downloaded from 1000G FTP

BWA version: 0.7.12  
Samtools version: 1.1  
Picard version: 2.1.0  
GATK version: 3.5

## BWA

```
bwa mem -t 32 fastq1.gz fastq2.gz  
| samtools view -u -  
| samtools sort -@ 12 -O bam -T sorted.bam.sort_tmp -o sorted.bam -
```

## Mark Duplicates

```
java -Xmx12G -jar picard.jar MarkDuplicates INPUT=sorted.bam  
OUTPUT=sorted.deduped.bam ASSUME_SORTED=true CREATE_INDEX=true  
MAX_RECORDS_IN_RAM=2000000 METRICS_FILE=MarkDuplicates_metrics.txt  
REMOVE_DUPLICATES=false
```

After MarkDuplicates, all lanes for the sample are merged into a single BAM file with MergeSamFiles in picard.

## Indel realignment

```
java -jar CommandLineGATK_deploy.jar -Xmx4G -R hg38.genome.fa -ip 50 -T  
RealignerTargetCreator -I sorted.deduped.merged.bam -known  
1000G_ALL.wgs.phase3_shapeit2_mvncall_integrated_v5b.20130502.sites.hg38.vcf -o  
realignment_targets.interval_list -nt 8 -mismatch 0.0  
  
java -jar CommandLineGATK_deploy.jar -Xmx4G -R hg38.genome.fa -ip 50 -T  
IndelRealigner -I sorted.deduped.merged.bam -targetIntervals  
realignment_targets.chr1.interval_list -known  
1000G_ALL.wgs.phase3_shapeit2_mvncall_integrated_v5b.20130502.sites.hg38.vcf  
--consensusDeterminationModel KNOWNS_ONLY -o sorted.deduped.merged.realigned.bam
```

## Base recalibration

```
java -jar CommandLineGATK_deploy.jar -Xmx4G -R hg38.genome.fa -T BaseRecalibrator -I  
sorted.deduped.merged.realigned.bam -knownSites dbsnp_146.hg38.vcf -o  
base_recalibration.table -nct 32 --useOriginalQualities --disable_indel_qual -cov  
ReadGroupCovariate -cov QualityScoreCovariate -cov CycleCovariate -cov  
ContextCovariate  
  
java -jar CommandLineGATK_deploy.jar -Xmx4G -R hg38.genome.fa -T PrintReads -nct 8 -I  
sorted.deduped.merged.realigned.bam -BQSR base_recalibration.table  
--disable_indel_qual --emit_original_qual -o  
sorted.deduped.merged.realigned.recalibrated.bam
```

## HaplotypeCaller

```
java -jar CommandLineGATK_deploy.jar -Xmx4G -R hg38.genome.fa -ip 50 -T HaplotypeCaller -I sorted.deduped.merged.realigned.recalibrated.bam -ERC GVCF -o g.vcf --annotation QualByDepth
```

```
java -jar CommandLineGATK_deploy.jar -Xmx4G -R hg38.genome.fa -T GenotypeGVCFs -o raw_calls.vcf -nt 8 -D dbsnp_146.hg38.vcf --variant g.vcf
```

## VQSR

```
java -jar CommandLineGATK_deploy.jar -Xmx20G -R hg38.genome.fa -T VariantRecalibrator --max_attempts 4 -input raw_calls.vcf -resource:ALL_1000G_phase3,known=false,training=true,truth=true,prior=12.0 1000G_ALL.wgs.phase3_shapeit2_mvncall_integrated_v5b.20130502.sites.hg38.vcf -resource:dbsnp,known=true,training=false,truth=false,prior=2.0 dbsnp_146.hg38.vcf -an DP -an QD -an FS -an SOR -an MQ -an MQRankSum -an ReadPosRankSum -mode SNP -nt 4 -tranche 99.5 -recalFile snps.recal -tranchesFile snps.tranches -allPoly
```

```
java -jar CommandLineGATK_deploy.jar -Xmx20G -R hg38.genome.fa -T ApplyRecalibration -input raw_calls.vcf -mode SNP --ts_filter_level 99.5 -recalFile snps.recal -tranchesFile snps.tranches -o recal.snps.raw.indels.vcf
```

```
java -jar CommandLineGATK_deploy.jar -Xmx20G -R hg38.genome.fa -T VariantRecalibrator --max_attempts 4 -input recal.snps.raw.indels.vcf -resource:ALL_1000G_phase3,known=false,training=true,truth=true,prior=12.0 1000G_ALL.wgs.phase3_shapeit2_mvncall_integrated_v5b.20130502.sites.hg38.vcf -resource:dbsnp,known=true,training=false,truth=false,prior=2.0 dbsnp_146.hg38.vcf -an QD -an DP -an FS -an SOR -an MQRankSum -an ReadPosRankSum -mode INDEL -nt 4 -tranche 99.0 -recalFile indels.recal -tranchesFile indels.tranches -allPoly
```

```
java -jar CommandLineGATK_deploy.jar -Xmx20G -R hg38.genome.fa -T ApplyRecalibration -input recal.snps.raw.indels.vcf -mode INDEL -ts_filter_level 99.0 -recalFile indels.recal -tranchesFile indels.tranches -o final.vcf
```

## DeepVariant and GATK on Platinum Genomes NA12878

We trained a deep learning model as described above using only the reads aligned to chromosomes 1 through 18 and evaluated variant calling accuracy on chromosomes 20 to 22 using both our algorithm and the community gold standard GATK best practices pipeline. We reserved chromosome 19 for hyperparameter optimization of the deep learning model. We created a non-overfitted GATK callset in which training does not see the data from chr20-22 by excluding that data during the GATK VQSR step.

For a comparison, we ran GATK v3.3 following Broad best practices as implemented by Google Cloud Genomics + Broad in the alpha version (see <https://cloud.google.com/genomics/>), run in



January 2016 on the NA12878 Platinum Genomes BAM file from <https://cloud.google.com/genomics/data/platinum-genomes>.

## DeepVariant vs. GATK on NA12878 replicates

Libraries were prepared from 35 independent replicates of 1ug aliquots of purified genomic DNA isolated from GM12878. During the library preparation process, samples were acoustically sheared to target fragment lengths of 400bp before proceeding through SPRI-based size selection, end repair, a-tailing, adapter ligation, and a final SPRI-based cleanup. The resultant libraries were quantified by Picogreen, Fragment Analyzer, and qPCR. Sequencing was performed using a 2x150 paired-end runs on Illumina HiSeq X sequencers with a targeted sequencing depth of 30x per sample.

Chromosomes 1-18 of the first eight sequenced replicates were used to train a single DeepVariant model by concatenating the labeled pileup images from each replicate into a single training set for DistBelief as previously described. Due to the timing of this experiment, version 2.19 of the Genome in a Bottle reference intervals and variant calls were used to label the genotypes in the training images and to evaluate the quality of the resulting variant calls on held out chromosomes 20-22. The previously described Verily GATK pipeline was used to process each NA12878 sample independently.

## Training and generalization of DeepVariant models across genome builds

DeepVariant was trained on data from human genome builds b37 and applied to b38. 80 hours of training was performed using data from chromosomes chr1-19 of the human NA12878 sample and evaluated on the held out human chromosomes chr20-22 (Table S1). The model trained with read data aligned to b37 of the human reference and applied to b38 data had similar performance (overall F1 = 99.45) to one trained on b38 and then applied to b38 (overall F1 = 99.53) thereby demonstrating the generalizability of the model (Table S1).

Supplementary Table S1: DeepVariant calling across genome builds

| <b>Variants</b> | <b>Training data</b> | <b>Evaluation data</b> | <b>PPV</b> | <b>Sensitivity</b> | <b>F1</b> |
|-----------------|----------------------|------------------------|------------|--------------------|-----------|
| SNPs + indels   | b37 chr1-19          | b38 chr20-22           | 99.93%     | 98.98%             | 99.45%    |
|                 | b38 chr1-19          | b38 chr20-22           | 99.87%     | 99.21%             | 99.53%    |
| SNPs            | b37 chr1-19          | b38 chr20-22           | 99.98%     | 99.23%             | 99.60%    |
|                 | b38 chr1-19          | b38 chr20-22           | 99.93%     | 99.35%             | 99.64%    |
| Indels          | b37 chr1-19          | b38 chr20-22           | 99.60%     | 97.35%             | 98.46%    |

|  |             |              |        |        |        |
|--|-------------|--------------|--------|--------|--------|
|  | b38 chr1-19 | b38 chr20-22 | 99.42% | 98.22% | 98.81% |
|--|-------------|--------------|--------|--------|--------|

## Training and generalization of DeepVariant models across species

In order to evaluate the transferability of a DeepVariant model across species we devised the following experiment. We trained a model using the Platinum Genomes NA12878 read set (aligned to b38) and Genome in a Bottle ground truth labels as described previously. We then applied that model to call variants in the synthetic mouse strain 129S1\_SvImJ from the Mouse Genome Project (MGP)<sup>7</sup>. For the sake of comparison we also trained models from the mouse read set using as ground truth the genotypes as provided by MGP.

We downloaded the read files (BAM) and variant calls (VCF) for the synthetic mouse strain 129S1\_SvImJ from the MGP website (Table S2).

Supplementary Table S2: Mouse dataset sources

| Sample      | Data | Location                                                                                                                                                                                                                                                                                                                                                                                                                      |
|-------------|------|-------------------------------------------------------------------------------------------------------------------------------------------------------------------------------------------------------------------------------------------------------------------------------------------------------------------------------------------------------------------------------------------------------------------------------|
| 129S1_SvImJ | BAM  | <a href="ftp://ftp-mouse.sanger.ac.uk/REL-1502-BAM/129S1_SvImJ.bam">ftp://ftp-mouse.sanger.ac.uk/REL-1502-BAM/129S1_SvImJ.bam</a>                                                                                                                                                                                                                                                                                             |
|             | VCF  | A combed VCF of <a href="ftp://ftp-mouse.sanger.ac.uk/REL-1505-SNPs_Indels/mgp.v5.merged.indels.dbSNP142.normed.vcf.gz">ftp://ftp-mouse.sanger.ac.uk/REL-1505-SNPs_Indels/mgp.v5.merged.indels.dbSNP142.normed.vcf.gz</a> and <a href="ftp://ftp-mouse.sanger.ac.uk/REL-1505-SNPs_Indels/mgp.v5.merged.snps_all.dbSNP142.vcf.gz">ftp://ftp-mouse.sanger.ac.uk/REL-1505-SNPs_Indels/mgp.v5.merged.snps_all.dbSNP142.vcf.gz</a> |
|             | REF  | GRCm38 from <a href="ftp://ftp-mouse.sanger.ac.uk/ref/GRCm38_68.fa">ftp://ftp-mouse.sanger.ac.uk/ref/GRCm38_68.fa</a>                                                                                                                                                                                                                                                                                                         |

The v5 of the mouse callset was created, according to this [README](#), with the following procedure:

*Reads were aligned to the reference genome (GRCm138) using BWA-MEM v0.7.5-r406 (Li and Durbin, 2009; Li, 2013). Reads were realigned around indels using GATK realignment tool v3.0.0 (McKenna et al., 2010) with default parameters. SNP and indel discovery was performed with the SAMtools v1.1 with parameters:*

*Samtools mpileup -t DP,DV,DP4,SP,DPR,INFO/DPR -E -Q 0 -pm3 -F0.25 -d500*

*and calling was performed with BCFtools call v1.1 with parameters:*

*Bcftools call -mv -f GQ,GP -p 0.99*

*Indels were then left-aligned and normalized using bcftools norm v1.1 with parameters:*

*bcftools norm -D -s -m+indels*

*The vcf-annotate function in the VCFtools package was used to soft-filter the SNP and indel calls. SNP calling was performed for each strain independently. A single list of all polymorphic sites across the genome was then produced from all of the 36 strains' SNP calls. This list was then used to call SNPs again, this time across all 36 strains simultaneously, using the 'samtools mpileup -l' option. The calls from all 36 strains were then merged into a single VCF file. All strain specific information was retained in the sample columns for each strain. For indels, the same approach was taken with the addition of the indel normalisation step after the initial variant calling. Information regarding the filtering of SNP and indel calls can be found in the VCF file headers in the '##FILTER' and '##source' lines.*

DeepVariant was run using the computational pipeline described above with all default settings. SNP and Indel mutations that were identified in the MGP ground truth set with genotype as 0/0 for this specific mouse were given the hom-ref label and likewise for heterozygous and homozygous variants. No-called sites were ignored during model training.

In order to protect against model overfitting, we divided our human and mouse genomes into a training set of chromosomes and an independent, held-out set of chromosomes (Table S3):

Supplementary Table S3: Training and evaluation chromosomes

|                   | Training chromosomes | Evaluation chromosomes |
|-------------------|----------------------|------------------------|
| Human NA12878     | chr1-19              | chr20-22               |
| Mouse 129S1_SvlmJ | chr1-17              | chr18-19               |

80 hours of training was performed using images prepared from the training chromosomes. After training the model was frozen and applied to call the variants from the read set. The resulting callsets were evaluated on variants on the held out chromosomes only (Table S4). As the Mouse project did not provide confident regions like the Genome in a Bottle project for NA12878, only non-reference variant calls that occur at a site present in the MGP with a genotype of homozygous reference are counted as false positives.

Supplementary Table S4: Calling performance of DeepVariant on human and mouse datasets

| <b>Variants</b> | <b>Training data</b> | <b>Evaluation data</b> | <b>PPV</b> | <b>Sensitivity</b> | <b>F1</b> |
|-----------------|----------------------|------------------------|------------|--------------------|-----------|
| SNPs + indels   | Human chr1-19        | Mouse chr18-19         | 99.53%     | 97.07%             | 98.29%    |
|                 | Mouse chr1-17        | Mouse chr18-19         | 99.90%     | 95.85%             | 97.84%    |
| SNPs            | Human chr1-19        | Mouse chr18-19         | 99.98%     | 97.86%             | 98.91%    |
|                 | Mouse chr1-17        | Mouse chr18-19         | 99.99%     | 99.10%             | 99.54%    |

|        |               |                |        |        |        |
|--------|---------------|----------------|--------|--------|--------|
| Indels | Human chr1-19 | Mouse chr18-19 | 96.41% | 91.75% | 94.02% |
|        | Mouse chr1-17 | Mouse chr18-19 | 99.15% | 73.80% | 84.62% |

## DeepVariant training on multiple sequencing technologies

BAM files were downloaded from the Genome in a Bottle project FTP server (Table S5). After downloading the BAM files are fixed up as indicated and converted to GA4GH protocol buffer format for processing with DeepVariant. The conversion preserves all of the essential read information in the BAM.

Supplementary Table S5: Multiple sequence technologies datasets

| Dataset                  | Sample  | BAM FTP location                                                                                      | Notes                                              |
|--------------------------|---------|-------------------------------------------------------------------------------------------------------|----------------------------------------------------|
| TruSeq exome             | NA12878 | Nebraska_NA12878_HG001_TrueSeq_Exome/NIST-hg001-7001-ready.bam                                        | Exome                                              |
| 10X GemCode 34x WGS      | NA12878 | 10XGenomics/NA12878_phased_possorted_bam.bam                                                          | Fixed BAM header                                   |
| 10X Chromium 75x WGS     | NA12878 | 10Xgenomics_ChromiumGenome/NA12878_GRCh37.bam                                                         | Fixed BAM header                                   |
| PacBio raw reads 40x WGS | NA12878 | NA12878_PacBio_MtSinai/sorted_final_merged.bam                                                        | Fixed BAM header                                   |
| Ion AmpliSeq exome       | NA24385 | ion_exome/HG002_NA24385_SRR1767409_IonXpress_020_rawlib_24038.bam                                     | Exome; Fixed BAM header; Trimmed unneeded BAM tags |
| HiSeq 60x WGS            | NA24385 | NIST_HiSeq_HG002_Homogeneity-10953946/NHGRI_Illumina300X_AJtrio_novoalign_bams/HG002.hs37d5.60x.1.bam |                                                    |
| HiSeq 31x WGS            | NA24385 | NIST_Illumina_2x250bps/novoalign_bams/HG002.hs37d5.2x250.bam                                          |                                                    |
| SOLID 85x WGS            | NA24385 | NIST_SOLiD5500W/alignment/5500W_HG002_merged.b37.bam                                                  | Trimmed unneeded BAM tags                          |

FTP paths are given relative to:

- For NA12878: <ftp://ftp-trace.ncbi.nlm.nih.gov/giab/ftp/data/NA12878/>
- For NA24385: [ftp://ftp-trace.ncbi.nlm.nih.gov/giab/ftp/data/AshkenazimTrio/HG002\\_NA24385\\_son/](ftp://ftp-trace.ncbi.nlm.nih.gov/giab/ftp/data/AshkenazimTrio/HG002_NA24385_son/)

Once converted to GA4GH format, candidate variants are identified using the read bases, qualities, QC flags, and mapping information in the original BAM file. The optional local assembly step was skipped for all datasets, as the assembler is tuned for Illumina data. The two

exome datasets were trained and evaluated using confident intervals derived from the intersection of the Genome in a Bottle confident intervals and the RefSeq<sup>8</sup> exon intervals.

For training of each dataset, candidate variants were identified using default parameters\* as well as emitting reference "variants" at ~0.1% of randomly selected reference bases. Pileup images were created for each candidate variant and labels assigned using Genome in a Bottle truth variants and intervals for the dataset's sample (see methods for details). These labeled images were filtered to only variants occurring on chromosomes 1-19, leaving 20-22 as an independent evaluation set. Training of the deep learning model was carried out for 250,000 steps starting from a model trained against chr1-19 variants from eight NA12878 replicates (see section DeepVariant vs. GATK on NA12878 replicates for details). After training completed the model was frozen and used to evaluate genotype likelihoods as the "technology-trained model".

For evaluation, candidate variants were identified using default parameters\* and pileup images were created for each candidate variant on chromosomes 20-22 only. The technology-trained model for the dataset was applied to these images to compute genotype likelihoods and the likelihoods were combined with the candidate variants to create final variant calls (see methods for details). The candidate variants and the final callset were evaluated again using only chr20-22.

\*The RAW PacBio read set was called with a slightly different parameter for the minimum fraction required for an alternate indel allele; we require a fraction of 0.18 rather than the default of 0.12 for all other datasets. At 0.12 over ~150M candidates are found, while at 0.18 we only have ~25M variants to consider. Using 0.18 significantly reduces indel sensitivity, from ~60% with 0.12 to around ~40% with 0.18, but is required to make the creation of pileup images tractable in the current implementation. The SNP threshold remains at 0.12 and produces a highly sensitive set at >99%.

## Comparison of DeepVariant exome calls with technology-specific variant calls submitted to Genome in a Bottle

We sought to compare the quality of DeepVariant calls to baseline callsets for each technology. As we already established the relative performance of DeepVariant and GATK on Illumina WGS data, we focused primarily on non-Illumina WGS and exome datasets. The challenge is that each technology uses a different data processing pipeline needing dataset-specific settings that are often not documented to produce optimal results. Therefore, we first sought SNP and indel variant calls submitted to Genome in a Bottle by the read data depositors as these are likely already optimized for calling performance on that technology. If not available, we applied the Verily GATK pipeline or, when that proved impossible, samtools, as an alternative variant calling option. The dataset and comparison callsets are given in Table S6.

It's important to recognize that these are apples-to-oranges comparisons. There is no way to ensure information on our evaluation chromosomes were not used to tune the submitters calling pipelines. Given that many tools, like the GATK, make direct use of population variation

information to aid in filtering variants, we should expect these callsets to be biased towards higher quality calls. Additionally, in some cases the submitters have used more information than DeepVariant to make calls, such as Ion AmpliSeq exome calls which used four lanes of data rather than our single lane. Finally, the callsets can differ in what regions of the genome were called, an acute issue for the exome datasets. To mitigate differences in exome intervals, we further intersected our RefSeq intervals down to those overlapping the calling intervals provides for the two exome datasets. Nevertheless, we feel that these issues are outweighed by the value of natural comparison points to assess the effectiveness of DeepVariant on these technologies.

Supplemental Table S6: Comparison datasets for Genome in a Bottle analysis

| Dataset                  | Comparator callset                                                                                                                                                                                                                                                                                                                         | Comparator notes                                                                                                                                                                                                                             |
|--------------------------|--------------------------------------------------------------------------------------------------------------------------------------------------------------------------------------------------------------------------------------------------------------------------------------------------------------------------------------------|----------------------------------------------------------------------------------------------------------------------------------------------------------------------------------------------------------------------------------------------|
| TruSeq exome             | <a href="ftp://ftp-trace.ncbi.nlm.nih.gov/giab/ftp/data/NA12878/Nebraska_NA12878_HG001_TrueSeq_Exome/NIST-hg001-7001-ensemble.vcf">ftp://ftp-trace.ncbi.nlm.nih.gov/giab/ftp/data/NA12878/Nebraska_NA12878_HG001_TrueSeq_Exome/NIST-hg001-7001-ensemble.vcf</a> and GATK                                                                   | An ensemble callset that includes calls from the GATK HaplotypeCaller, UnifiedGenotyper, and FreeBayes over the TruSeq exome targeted regions ( <a href="#">BED</a> ).                                                                       |
| 10X GemCode 34x WGS      | None                                                                                                                                                                                                                                                                                                                                       | No callset submitted to Genome in a Bottle. Focusing on Chromium callset from 10x instead.                                                                                                                                                   |
| 10X Chromium 75x WGS     | <a href="ftp://ftp-trace.ncbi.nlm.nih.gov/giab/ftp/data/NA12878/10Xgenomics_ChromiumGenome_LongRanger2.1_09302016/NA12878_hg19/NA12878_hg19_phased_variants.vcf.gz">ftp://ftp-trace.ncbi.nlm.nih.gov/giab/ftp/data/NA12878/10Xgenomics_ChromiumGenome_LongRanger2.1_09302016/NA12878_hg19/NA12878_hg19_phased_variants.vcf.gz</a> and GATK |                                                                                                                                                                                                                                              |
| PacBio raw reads 40x WGS | Samtools; we could not get GATK to run on this dataset.                                                                                                                                                                                                                                                                                    | Only structural variant calls were submitted for the Pacific BioSciences WGS data.                                                                                                                                                           |
| Ion AmpliSeq exome       | <a href="ftp://ftp-trace.ncbi.nlm.nih.gov/giab/ftp/data/Ashkenazi_mTrio/analysis/IonTorrent_TVC_03162015/AmpliseqExome.20141120.NA24385.vcf">ftp://ftp-trace.ncbi.nlm.nih.gov/giab/ftp/data/Ashkenazi_mTrio/analysis/IonTorrent_TVC_03162015/AmpliseqExome.20141120.NA24385.vcf</a> and GATK                                               | variant calls from the Torrent Variant Caller (VCF) made on the Ion effective intervals ( <a href="#">BED</a> ). The TVC caller used all four lanes of Ion torrent exome data, but DeepVariant made its call only one a single lane of data. |
| HiSeq 60x WGS            | None                                                                                                                                                                                                                                                                                                                                       | Not analyzed as DeepVariant performance already well-established on Illumina data                                                                                                                                                            |
| HiSeq 31x WGS            | None                                                                                                                                                                                                                                                                                                                                       | Not analyzed as DeepVariant performance already well-established on Illumina data                                                                                                                                                            |
| SOLID 85x WGS            | GATK                                                                                                                                                                                                                                                                                                                                       | No calls submitted to Genome in a Bottle for NA24385. There appear to be no maintained variant callers for SOLID data.                                                                                                                       |

Samtools calling on PacBio raw reads 40x WGS

```
#!/bin/bash

# Only calling on chromosomes 20, 21, and 22.
CHROMS=('20:1-20,000,000' '20:20,000,000-40,000,000' '20:40,000,000-63025520'
'21:1-20,000,000' '21:20,000,000-40,000,000' '21:40,000,000-48129895'
'22:1-20,000,000' '22:20,000,000-40,000,000' '22:40,000,000-51304566')

# Run calling on each interval separately.
parallel -j ${#CHROMS[@]} "samtools view -u NA12878_PacBio-RAW.bam {} \
| samtools mpileup -ugf GRCh37.genome.fa - \
| bcftools call -vm0 z -o NA12878_PacBio-RAW.samtools.calls.{}.vcf.gz" :::
${CHROMS[*]}

# Conconcat parallel calling VCFs.
bcftools concat -a -0 z --rm-dups all \
NA12878_PacBio-RAW.samtools.calls.??\:* .vcf.gz \
-oNA12878_PacBio-RAW.samtools.calls.vcf.gz
tabix NA12878_PacBio-RAW.samtools.calls.vcf.gz

# Filter recommendations taken from bcftools website with depth of 40x.
bcftools filter -0 z -o NA12878_PacBio-RAW.samtools.calls.filtered.vcf.gz \
-s FAIL -i'DP < 67 && QUAL > 10 & DP >= 3' --SnpGap 3 \
NA12878_PacBio-RAW.samtools.calls.vcf.gz
tabix NA12878_PacBio-RAW.samtools.calls.filtered.vcf.gz
```

Table S7 shows the PPV, sensitivity, and F1 metric of the DeepVariant and comparator callsets on the previously-indicated regions on the held-out chromosomes 20-22. For exomes the evaluation interval is the intersection of the targeted regions with the RefSeq intervals on chromosomes 20-22.

Supplementary Table S7: Comparison of technology specific callsets and DeepVariant for SNPs + indels combined

| Data                  | Caller      | Sensitivity | PPV    | F1     |
|-----------------------|-------------|-------------|--------|--------|
| Ion AmpliSeq exome    | DeepVariant | 94.12%      | 99.79% | 96.87% |
|                       | TVC         | 96.47%      | 98.11% | 97.28% |
|                       | GATK        | 93.24%      | 19.15% | 31.78% |
| Illumina TruSeq exome | DeepVariant | 93.01%      | 99.39% | 96.09% |
|                       | Ensemble    | 92.92%      | 98.08% | 95.43% |
|                       | GATK        | 91.02%      | 99.30% | 94.98% |
| 10X Chromium 75x WGS  | DeepVariant | 98.73%      | 99.91% | 99.32% |
|                       | Long-ranger | 98.13%      | 98.26% | 98.19% |
|                       | GATK        | 99.08%      | 94.62% | 96.80% |



|                          |             |        |        |        |
|--------------------------|-------------|--------|--------|--------|
| PacBio raw reads 40x WGS | DeepVariant | 88.51% | 97.25% | 92.67% |
|                          | samtools    | 89.34% | 40.89% | 56.10% |
| SOLID 85x                | DeepVariant | 76.62% | 99.01% | 86.39% |
|                          | GATK        | 73.91% | 84.26% | 78.75% |

As noted in the "evaluation of variants" section, the difference between evaluation methods may be exaggerated in this multiple sequencing technologies experiment. We intentionally chose to use the already aligned BAM files as provided by Genome in a Bottle in order to highlight the robustness of DeepVariant to variation in input alignments without applying local assembly, which may perform better on Illumina read than other NGS read types. One consequence of this choice, though, is that DeepVariant will only call alleles present in the CIGAR elements of the BAMs, which vary in their accuracy depending on the sophistication of the aligner and post-alignment cleanup steps performed during processing by each technology's data depositor. The DeepVariant CNN is sufficiently robust to train accurate genotyping models even with errorful allele determination, as evident by the high PPV values, but inevitably produces variant calls with incorrect alleles at any site where the reads have been aligned with an incorrect allele in their CIGAR elements. As noted in the main text, better pre-processing via tools like the GATK's IndelRealigner<sup>6</sup> or technology-agnostic local assembly will improve the alleles emitted by DeepVariant. Additionally, it is possible that our comparator callsets may use variant representations that are differentially penalized by our evaluation tool. Because of these concerns, we ran both our internal evaluation tool and vcfEval (version 3.6.2) and note that the results are quite concordant between both methods. The full output is available as a supplementary datafile.

## References

1. Dean, J. *et al.* Large Scale Distributed Deep Networks. *Adv. Neural Inf. Process. Syst.* 1223–1231 (2012).
2. Szegedy, C., Vanhoucke, V., Ioffe, S., Shlens, J. & Wojna, Z. Rethinking the Inception Architecture for Computer Vision. *arXiv.org cs.CV*, (2015).
3. Zook, J. M. *et al.* Integrating human sequence data sets provides a resource of benchmark SNP and indel genotype calls. *Nat. Biotechnol.* **32**, 246–251 (2014).
4. Li, H. Towards Better Understanding of Artifacts in Variant Calling from High-Coverage Samples. *arXiv.org q-bio.GN*, 2843–2851 (2014).



5. Cleary, J. G. *et al.* Comparing Variant Call Files for Performance Benchmarking of Next-Generation Sequencing Variant Calling Pipelines. *bioRxiv* (2015).
6. DePristo, M. A. *et al.* A framework for variation discovery and genotyping using next-generation DNA sequencing data. *Nat. Genet.* **43**, 491–498 (2011).
7. Keane, T. M. *et al.* Mouse genomic variation and its effect on phenotypes and gene regulation. *Nature* **477**, 289–294 (2011).
8. O’Leary, N. A. *et al.* Reference sequence (RefSeq) database at NCBI: current status, taxonomic expansion, and functional annotation. *Nucleic Acids Res.* **44**, D733–45 (2016).
